# Supplementary material for: Involvement of multiple phytoene synthase genes in tissue- and cultivar-specific accumulation of carotenoids in loquat
Source: PubMed Central journal article supplement (PMC4115255; doi:10.1093/jxb/eru257), 2014-06-16
Supplement: supp_eru257_jexbot123729_file001.pdf [file supp_eru257_jexbot123729_file001.pdf]

# Involvement of multiple phytoene synthase genes in tissue- and cultivar-specific accumulation of carotenoids in loquat

Xiumin Fu, Chao Feng, Chunyan Wang, Xueren Yin, Pengjun Lu, Don Grierson, Changjie Xu, Kunsong Chen

>Unigene46522\_LYQ

```
ATTTGCCAACTACCACTGCTTTCAAACCTTTTGCCTTACCCTCCAATCTCCATAAGAGAAGCCACAACCTCACAGCTCACATACT
CACACCCTCACACTCAAACCTAAAACCCAACAGATTAATTGTTCTTTTGATATGTCAGTTGTTCTTTTGGGTGGTGAGCCCC
AAACAGAATGCCAGCTCCCTGCTGGGTCTGATGCCCAGAATTTGCACCCCAAGGAGGTCTAAATTCTGCCCGAAGCTGGGATTT
TCAAGTAGGGTTTTGGCCTACTCGGGTGCAGTTGTAAACCCAGCAAGGTCTTCAGAAGAGAAGGTGTATGAAGTGGTGCTGAA
GCAGGCTGCGCTGGTGAAGAACAGAGCACGGTAAAAAGGAAATCTTTGGATTTGGATGAACGGATTGTAAGTGAAGGTTTGG
ACAAGTGGGATTTACTGGATAAGGCTTATGATCGGTGTGGTGAAGTCTGTGCTGAGTATGCCAAGACTTTTTACCTGGGCACAT
TGCTCATGACACCGGAGCGGCGACGAGCTGTTGGGCAATCTATGTGTGGTGCAGAAGGACAGATGAGCTAGTGGATGGACCT
AATGCTTCATACATTACACCCAAAGCTCTTGACAGATGGGAGAAAAGACTGACTGATCTCTTTGAAGGCCGACCTTACGATATG
TATGATGCTGCTCTATCTGATACTGTCACCAAGTACCCCGTTGACATTACAGCCCTTCAGAGACATGGTAGAAGGAATGAGATTA
GACTTGAGGAAGTCAAGATAACCAGAACTTTGATGAACCTTTACCTTTACTGCTACTATGTTGCTGGAACCTGTTGGATTGATGAGT
GTTCCGGTGTATGGGGATATGCCCAGAATCAAGGGCCTCAACAGAAAAGCGTTTACAATGCTGCATTGGCCCTTGAATTGCTAAT
CAGCTCACTAACATTCTCAGAGATGTTGGAGAAGATGCTAGGAGAGGAAGAGTATATCTCCCCAAGATGAGCTTGCCCAAGC
CGGCCTATCAGACGATGACATCTTTTCGCGGGAAGGTGACTGACAAGTGGCAAAGTTTCATGAAGGGACAAATACAGAGAGCTA
GGATGTTCTTTGATGAGGCTGAGAAGGGTGTCTCAGAGCTCAACTCAGCTAGTAGATGGCCAGTATGGGCATCTTTGTTGCTGT
ATAGGCAGATTCTAGATGTAATTGAAGCAAATGGTTATGACAATTTACAAAAAGGGCTTATGTGGGAAAAGCAAAGAAGTTT
GTATCGTTGCCTGTGGCCTATGGAAGAGCCATTATAGGACCCTCTAAATTAAGCAAGTGGTGCCTAGATGAATTAGATGA
TATTTGAAGTCTCAATCTCTAAATTTTAGACAAAAGTCCAACCTTGAAGTTGGGTCTCAAGTCGAAATATGTAAATTTTTTATACT
AAATTTTTTTTAGTCAATCTTTAATTACCTGTGTTGGATGACGGATATAAAAAGTGGTAATTAGTGGCAGAGGTTAATAGATGT
GTGGTGAGAGTGGTCGCCATGGACTGGTTGATAGATGTGTCAAGTGGAGGTAGAGTGTCTCCTAGTGATAAGGTGGTAGCAATT
GTGGTTGTGGCATTGGCGGTGGTGTATGGTTGTGGGAGGTGGTGGTGACGGTGTATGGTGGATATGATTGGAATGATGGTGGCAA
TAGCAATGACATTGGGGGTTTCATGGTAGTACTTATGGTCATGAGAGT
```

>Unigene51742\_LYQ

```
TGTCTAAAAATTTAGAGATTGAGACTTCAAATATCATCTAATTCATCTAGGCACCAACTGCTTAGTTAATTTAGAGGGTCCTAT
AATGGCTCTTCCATAGGCCACAGGCAACGATACAAACTTCTTTGCTTTTCCACATAAGCCCTTTTTGTGAAATTGTCATAACCA
TTTGCTCAATTACATCTAGAATCTGCCTATACAGCAACAAAGATGCCCATACTGGCCATCTACTAGCTGAGTTGAGCTCTGAG
ACACCCTTCTCAGCCTCATCAAAGAACATCCTAGCTCTCTGTATTTGTCCCTTCATGAACTTTGCCACTTGTGAGTCACCTTCC
CGCGAAAGATGTCATCGTCTGATAGGCCGGCTTGGGCAAGCTCATCTTGGGGGAGATATACTCTTCTCTCCTAGCATCTTCTC
CAACATCTCTGAGAATGTTAGTGAGCTGATTAGCAATTCGAAGGGCCAATGCAGCATTGTAACGCTTTCTGTTGAGGCCCTTG
ATTCTGGGCATATCCCATCACCGGAACACTCATCAATCCAACAGTTCAGCAACATAGTAGCAGTAAAGGTAAAGTTTCATCA
AAGTTCTGGTATCTTGACTTCTCAAGTCTAATCTCATTCTTCTACCATGTCTCTGAAGGGCTGAATGTCAAC
```

>Unigene26970\_LYQ

```
CGTCGCCGCTCCGGTGTGATGAGCAATGTCCCTAGGTAAAAAGTCTTGGCATACTCTGCACAGACCTCACCACACCGGTCATAC
GCCTTATTCAGTAAATCCAGTTGTTCAAACCGTCAGTAATCCGTTTCATCCAAATCCAAAGATTTCTTTTTTACCGTGTTCGGTT
CTTCACTAGAGCAGCCTGCTTCA
```

>Unigene32141\_LYQ

```
CGTCGCCGCTCCGGTGTGATGAGCAATGTGCCCAGGTAAAAAGTCTTGGCATACTCAGCACAGACTTCACCACACCGATCATAA
GCCTTATCCAGTAAATCCAGTTGTCCAAACCTTCAGTTACAATCCGTTTCATCCAAATCCAAAGATTTCTTTTTTACCGTGTCTCT
GTTCTTCCACCAGCGCAGCCTGCTTTCAGCACCACTTCATACACCTTCTC
```

>Unigene38534\_LYQ

TACTCACACCCTCACACTCAAAACCTAAAACCCAACAGATTAATTGTTCTTTTGATATGTCAGTTGTTCTTTGGGTGGTGAG  
CCCCAAACAGAATGCCAGCTCCCTGCTGGGTCTGATGCCAGAATTTGCACCCCAAGGAGGTCTAAATCTGCCCGAAGCTGG  
GATTTTCAAGTAGGGTTTTGGCCTACTCGGGTGCAGTTGTAAACCCAGCAAGGTCTTCAGAAGAGAAGGTGTATGAAGTGGTG  
CTGAAGCA

>Unigene7419\_LYQ

CTTCTCTGGGTGGTGAGTCCCAAAGAGAATGCCAACTCTCTGCTGGGTCTGTTGCCGAGAATTTGCACCCCAAGGAGGTCTAAA  
TTGTGCTCAAAGCTGGGTTTTTCAAGTGGNNNNNNNNNNNNNNNNNNNNNNNNNNNNNNNNNNNNNNNNNNNNNNCAGTTGCAAACCCAGCCAG  
ATCTTCAGAGGAGAAGGTGTATGAAGTGGTGTGAAGCA

>Unigene7419\_LYQ

CTTCTCTGGGTGGTGAGTCCCAAAGAGAATGCCAACTCTCTGCTGGGTCTGTTGCCGAGAATTTGCACCCCAAGGAGGTCTAAA  
TTGTGCTCAAAGCTGGGTTTTTCAAGTGGNNNNNNNNNNNNNNNNNNNNNNNNNNNNNNNNNNNNNNNNNNNNNNCAGTTGCAAACCCAGCCAG  
ATCTTCAGAGGAGAAGGTGTATGAAGTGGTGTGAAGCA

>Unigene13461\_LYQ

AGATACCAAAGCTTCGATGAACTATATCTTTACTGCTATTATGTTGCCGGAAGTGTGGATTAATGAGTGTCCAGTTATGGGC  
ATTTACCTGAATCGCAAGCAACAACGGAGAGTGTATATAACGCTGCCTTGGCGTTAGGGATTGCGAATCAGCTAAACAAACAT  
ACTCCGTGATGTTGGGGAGGATGCAAGGAGAGGAAGAATTTATTTACCCCAAGATGAGCTTGCAGAAGCAGGGCTCTCCGACG  
CTGATATATATGCTGGGAAGGTACAGACAAAATGGAGGAGTTTCATGAAGGATCAAATTAAGAGGGCAAGGATGTTCTTCGAC  
GAGGCAGAGAAGGGAGTGACAGAGTTGAGTGAAGCCAGCAGATGGCCGGTATTGGCGTCTACTCCTATATCGCCAAATATT  
GGACGAGATAGAAGCTAACGATTACNNNNNNNNNNNNNNNNNNNNNGTAAAGCAAGCTAAGAAATTAAGTGCCTTGCCTATTGCG  
TATACTAAATCGATAATTCGCCCCCAAGAACCTCTCCAGAGCTTAGAAAATACAATCTTTGACAACAAAATGCTGGAGTTGCC  
TATATATGTATAGANNNNNNNTGTATAGAGATTGAAAAGCAGAATTTGTATACTATAAATTGTATTGTTGCAGCCTGTATTTA  
TAAACTGAAGGGTGTATTATTCCAGTTCAAAG

>Unigene46044\_LYQ

GGAGGGTCTGGTTTAGGGAGCGAAACCAAATTTCCAGTTTTATTAAGCATGGTGGCCAACCCGCTTGGAGAATCAGCTGTCTCG  
TCGGAACAGAAGGTGTATGATGTGGTGCTGAAGCAGGCATCCTTGGGTAAGAAGCAGTTGAGTTCTAATGGATATCTTGATGT  
GAAGCGGGATATTATTCTACCCGGGAATCTGAGCTTGTGAGTAAAGCTTATGATCGATGTGGAGAAGTATGTGCGGAGTATG  
CCAAGACCTTTACCTCGGTACCCTGCTTATGACGCCGAAAGAAGAAGGGCCATCTGGGCAATATATGTGTGGTGCAGGAGG  
ACGGATGAGCTTGTGATGG

>Unigene54535\_BS

CAACATCCATACTCTCATGACCATAAGTACTACCATGAACCAAGCTCATCTTGGGGGAGATATACTCTTCCTCTCCTAGCATCTT  
CTCCAACATCTCTGAGAATGTTAGTGAGCTGATTAGCAATTTCAAAGGGCCAATGCAGCATTGTAAACGCTTTCTGTTGAGGCC  
TTGATTCTGGGCATATCCCCATCACCGGAACACTCATCAATCCAACAGTTCCAGCAACATAGTAGCAGTAAAGGTAAGTTCAT  
CAAAGTTCTGGTATCTTGACTTCTCAAGTCTAATCTCATTCCTTCTACCATGTCTCTGAAGGGCTGAATGTCAACGGGGTACTT  
GGTGACAGTATCAGATAGAGCAGCATCATAATATCGTAAGGTCCGCTTCAAAGAGATCAGTCAGTCTTTTCTCCCATCTGTC  
AAGAGCTTTGGGTGTAATGTATGAAGCATTAGGTCCATCCACTAGCTCATCTGTCTTCTGCACCACACATAGATTGCCCAAAC  
AGCTCGTCGCCGCTCCGGTGTATGAGCAATGTGCCAGGTAAGCA

>Unigene53723\_BS

GACACACATTTGCCAACTACCCTGCTTTCAAACCTTTTGCCTTACCCTCCAATCTCCATAAGAGAAGCCACAACCTCACAGCT  
CACATACTCACACCCTCACACTCAAAACCTAAAACCCAACAGATTAATTGTTCTTTTGATATGTCAGTTGTTCTTTGGGTGG  
TGAGCCCCAAACAGAATGCCAGCTCCCTGCTGGGTCTGATGCCAGAATTTGCACCCCAAGGAGGTCTAAATTTCTGCCCGAAG  
CTGGGATTTCAAGTAGGGTTTTGGCCTACTCGGGTGCAGTTGTAAACCCAGCAAGGTCTTCAGAAGAGAAGGTGTATGAAGT  
GGTGTGAAGCAGGCTGCGCTGGTGAAGAACAGAGCACGGTAAAAGGAAATCTTTGGATTGGATGAACGGATTGTAAGT  
AAGGTTTGGACAACCTGGGATTTACTGGATAAGGCTTATGATCGGTGTGGTGAAGTCTGTGCTGAGTATGCCAAGACTTTTT

**Supplementary Fig. S1. Unigene sequence of PSY in loquat RNA-Seq libraries.**

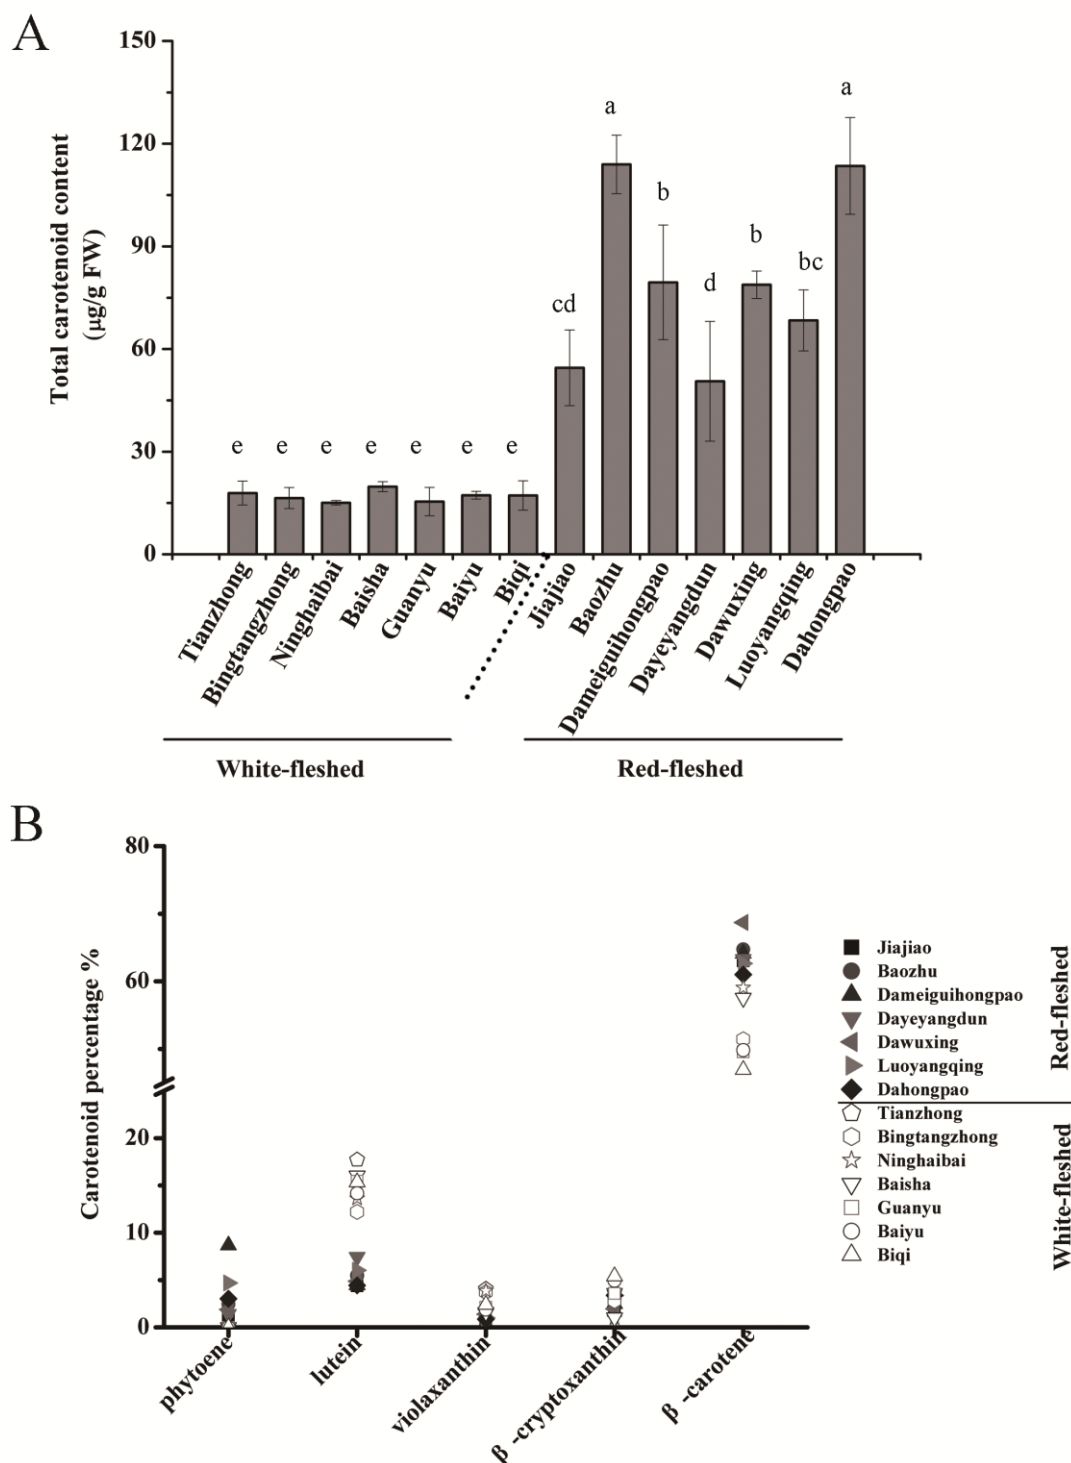

**Supplementary Fig. S2. Carotenoid content and composition in the peel of red- and white-fleshed loquat cultivars.** The percentage of the main carotenoids (phytoene, lutein, violaxanthin,  $\beta$ -cryptoxanthin and  $\beta$ -carotene) in the peel of red- and white-fleshed loquat cultivars was analyzed by HPLC.

|                      |                                                                       |
|----------------------|-----------------------------------------------------------------------|
| EjPSY2A              | MSVLLWVSPKQNASLLGLMPRICTPRRSKFCPKLGFSSRVLAYS GAVVNPARSSEEK            |
| EjPSY2A <sup>d</sup> | MSVLLWVSPKQNASLLGLMPRICTPRRSKFCPKLGFSSRVLAYS GAVVNPARSSEEK<br>*****   |
| EjPSY2A              | VYEVVLKQAALVEEQSTVKRKSLLDERIVTEGLDNWDL LDKAYDRCGEVCAEYAKTFYL          |
| EjPSY2A <sup>d</sup> | VYEVVLKQAALVEEQSTVKRKSLLDERIVTEGLDNWDL LDKAYDRCGEVCAEYAKTFYL<br>***** |
| EjPSY2A              | GTLMLTPERRRAVWAIYVWCRRTDELVDGPNASYITPKALDRWEKRLTDLFEGRPYDMYD          |
| EjPSY2A <sup>d</sup> | GTLMLTPERRRAVWAIYVWCRRTDELVDGPNASYITPKALDRWEKRLTDLFEGRPYDMYD<br>***** |
| EjPSY2A              | AALS DTVTKYPVDIQPFRDMVEGMRLDLRKSRYQNFDELYLYCYVAGTVGLMSVPVMGI          |
| EjPSY2A <sup>d</sup> | AALS DTVTKYPVDIQPFRDMVEGMRLDLRKSRYQNFDELYLYCYVAGTVGLMSVPVMGI<br>***** |
| EjPSY2A              | CPESRASTESVYNAALALGIANQLTNILRDVGEDARRGRVYLPQDELAQAGLSDDDI FRG         |
| EjPSY2A <sup>d</sup> | CPESRASTESVYNAALALGIANQLTNILRDVGEDARRGRVYLPQDELGSW-----<br>*****.     |
| EjPSY2A              | KVTDKWQSFMKGQIQRARMFFDEAEKGVSELNSASRWPVWASLLLYRQILDVIEANGYDN          |
| EjPSY2A <sup>d</sup> | -----                                                                 |
| EjPSY2A              | FTKRAYVGKAKK FVSLPVAYGRAIIGPSKLTQLVPR-                                |
| EjPSY2A <sup>d</sup> | -----                                                                 |

**Supplementary Fig. S3. Comparison of the deduced amino acid sequences of EjPSY2A and EjPSY2A<sup>d</sup>. Amino acid sequences were aligned using Clustal X**

A

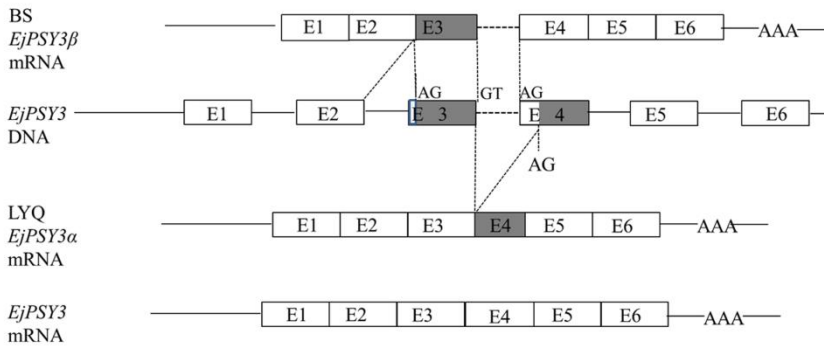

B

```

EjPSY3α  MCSTISFAGKTYIGESNGRI RRRKSMVTA AKAQVITAPKQRSRPVFPPELSIQGIPLADLH
EjPSY3   MCSTISFAGKTYIGESNGRI RRRKSMVTA AKAQVITAPKQRSRPVFPPELSIQGIPLADLH
EjPSY3β  MCSTISFAGKTYIGESNGRI RRRKSMVTA AKAQVITAPKQRSRPVFPPELSIQGIPLADLH
*****

EjPSY3α  VQEI VQRQSQTRSVDGEGRRRPRFNP SFLEEAYERCKNLCAEYAKTFYLGTLTLMTEERQ
EjPSY3   VQEI VQRQSQTRSVDGEGSRRRPRFNP SFLEEAYERCKNLCAEYAKTFYLGTLTLMTEERQ
EjPSY3β  VQEI VQRQSQTRSVDGEGSRRRPRFNP SFLEEAYERCKNLCAEYAKTFYLGTLTLMTEERQ
*****

EjPSY3α  KAIWAIYVWCRRTDELVDGPN SGYMSSEVLD RWEQRL EDIFEGRPYDMLDAALHTVFNF
EjPSY3   KAIWAIYVWRRRTDELVDGPN SGYMSSEVLD RWEQRL EDIFEGRPYDMLDAALHTVFNF
EjPSY3β  KAIWAIYG-----GQTNWMAQIPVT-----
*****          *.. :*:. :

EjPSY3α  PLDIKERSA-----
EjPSY3   PLDIKPF RDMIEGMRMDTQKCRYQNFQELYL CYVYVAGTVGLMSVPV MGIAPDSRISAQS
EjPSY3β  -----

EjPSY3α  -----
EjPSY3   TYDSALYLGIGNQLTNILRDVGEDAMRGRVYLPQDELARFGLCDNDVFSRKVTDKWR AFM
EjPSY3β  -----

EjPSY3α  -----
EjPSY3   KEQITRARFYFNLAEEGASQLDKASRWPVWSSLLIYRNILD AIEDNDYDNLTKRAYVQRA
EjPSY3β  -----

EjPSY3α  -----
EjPSY3   KKLLMLPLAYTRSLSTHNLMSQ-
EjPSY3β  -----

```

**Supplementary Fig. S4. Analysis of the alternative splicing of *EjPSY3α* and *EjPSY3β*.** (A) The differences in alternative splicing of *EjPSY3* in the LYQ and BS varieties. E, exon; AG, splicing acceptor site; GT: splicing donor site. In the LYQ variety 97 bases of the fourth exon were lost in *EjPSY3α*. In the BS variety, 10 bases of the third exon were lost and the former third intron was retained in *EjPSY3β*; Normal *EjPSY3* mRNA was observed in the Jiajiao variety. The diagram is not to scale. (B) The amino acid sequence alignment of *EjPSY3*, *EjPSY3α* and *EjPSY3β*.

```

E.jPSY2A      MSVLLWVSPKQNASSLLGLMP--RICTPRRSKFCPKLGFSG-----SRVLAYS---
E.jPSY2B      MSGVLLWVSPKENANSLGLLP--RICTPRRSKLCCKLGFSG-----SGVLAYS---
E.jPSY1       MSVALIWVYSANTEVFKFYGLDSSRFVLGNRSSIRAKMGAKQDWKSCSLSTHVKYSSVVG
E.jPSY3       MCSTISFAG--KTYIGESNGRIR-----RRKSMVTAAKAQ-----VITAPKQR---
* . . : . : * : * * . . . .

E.jPSY2A      -----GAVVNP---ARSSEEKVYEVVLKQAALVEEQSTVKKRSLDLDERI
E.jPSY2B      -----GAVANP---ARSSEEKVYEVVLKQAALVREPNTVKKKSLDLDER-
E.jPSY1       GSGLGSETKFPVLLSMVANPLGESAVSSEQVYDVVLKQASLGKKQLSSNG-YLDVKRDI
E.jPSY3       -----SRPVFP---ELSTGGIPLADLHVQELVQRQSQTRSADGEGGRR-
. . * * : : . * : : . . . . :

E.jPSY2A      VTEGLDNWDLLEKAYDRCGEVCAEYAKTFYLGTLTMTERRRAVWAIYVWCRRIDELDVDG
E.jPSY2B      ITDGLNNWDLLEKAYDRCGEVCAEYAKTFYLGTLTMTERRRAVWAIYVWCRRIDELDVDG
E.jPSY1       ILPG--NLKLLSKAYDRCGEVCAEYAKTFYLGTLTMTERRRAIWA IYVWCRRIDELDVDG
E.jPSY3       --RPRFNPSFLEEAYERCKNLCAEYAKTFYLGTLTMTERRQKAIWA IYVWCRRIDELDVDG
* . : * : * * * : * : * : * : * : * : * : * : * : * : * : * : * : * : * : * :
* : * : * : * : * : * : * : * : * : * : * : * : * : * : * : * : * : * : * : * : * : * :
* : * : * : * : * : * : * : * : * : * : * : * : * : * : * : * : * : * : * : * : * : * :

E.jPSY2A      PNASYITPKALDRWEKRLTDLFGRPYDMYDAALSDTVTKYPVDIQPFPRMVEGMRLDRL
E.jPSY2B      PNASYITPKALDRWEKRLTDLFGRPYDMYDAALSDTVAKYPVDIQPFPRMVEGMRLDRL
E.jPSY1       PNASHITPALDRWESRLDDLFCGRPFMDLDAALSDTVTKYPVDIQPFKDMIEGMRMDRL
E.jPSY3       PNSGYMSSEVLDRWEQLEDIFGRPYDMLDAALTHTVFNFPLDIKPFPRMIEGMRMDTG
* : . : : . . * : * : * : * : * : * : * : * : * : * : * : * : * : * : * : * : * : * : * :
* : * : * : * : * : * : * : * : * : * : * : * : * : * : * : * : * : * : * : * : * : * :

E.jPSY2A      KSRYQNDELYLYCYVVAGTVGLMSVPVMGICPESRASTESVYNAALALGIANQLTNILR
E.jPSY2B      KSRYQNDELYLYCYVVAGTVGLMSVPVMGISPESKASTESVYNAALALGIANQLTNILR
E.jPSY1       KSRYQSDELYLYCYVVAGTVGLMSVPVMGISPESQATTESVYNAALALGIANQLTNILR
E.jPSY3       KCRYQNDELYLYCYVVAGTVGLMSVPVMGIAPSRISAQSTYDSALYLGIGNQLTNILR
* * * * * : * : * : * : * : * : * : * : * : * : * : * : * : * : * : * : * : * : * :
* : * : * : * : * : * : * : * : * : * : * : * : * : * : * : * : * : * : * : * : * : * :

E.jPSY2A      DVGEDARRGRVYLPQDELAQAGLSDDDIFRGKVTDKWSFMKGQIQRARMFFDEAEKGVS
E.jPSY2B      DVGEDARRGRVYLPQDELAQAGLSDNDIFRGKVTDKWSFMKGQIKRARMFFDEAEKGVS
E.jPSY1       DVGEDARRGRIYLPQDELAQAGLSDDIYAGKVTDKWSFMKQIQRARMFFDEAEKGVT
E.jPSY3       DVGEDARRGRVYLPQDELARFGLCDNDVFSRKVTDKWRAFMEQITRARIYFLAEEGAS
***** * : * : * : * : * : * : * : * : * : * : * : * : * : * : * : * : * : * : * :
* : * : * : * : * : * : * : * : * : * : * : * : * : * : * : * : * : * : * : * : * : * :

E.jPSY2A      ELNSASRWPVWASLLLYRQILDVIEANGYDNFTKRAYVGKAKKVFSLPVAYGRAIIGPSK
E.jPSY2B      ELNSASRWPVWASLLLYRQILDAIEANGYDNFTKRAYVGKAKKLASLPVAYGRAIIGPSK
E.jPSY1       ELSASRWPVWASLLLYRQILDEIEANDYNNFTRRAYVSKAKKLLALPIAYTKSIRPPR
E.jPSY3       QLDSASRWPVWSSLLYRNILDAIENDYDNLTKRAYVQRAKLLMLPLAYTRSLSTHNL
* . : * : * : * : * : * : * : * : * : * : * : * : * : * : * : * : * : * : * :
* : * : * : * : * : * : * : * : * : * : * : * : * : * : * : * : * : * : * : * : * : * :

E.jPSY2A      LTKQLVPR---
E.jPSY2B      LTKQLVPR---
E.jPSY1       TSPELRKYNL-
E.jPSY3       MSQ-----

```

**Supplementary Fig. S5. Alignment of EjPSYs amino acid sequences.** Amino acids 159, 176 and 242 (underlined) have been shown to affect the activity or location of PSY in cassava (Welsh *et al.*, 2010), tomato (Gady *et al.*, 2011) and maize (Shumskaya *et al.*, 2012); Underlining indicates PSY signature motifs 1 and 2 (conserved domain); Amino acids in bold in EjPSY3 sequence near or at motif 2 is different from other EjPSYs; Shading indicates  $\alpha$ -helix, predicted by Swiss-model according to the structure of squalene synthase (PDB: 4HD1); Box indicates DXXXD putative active site. Amino acid numbers refer to EjPSY2A sequence.

|                |                | 252              | 260             | 264        | Motif 2     |             |                                   |                                    |                                   |          |          |          |          |          |          |          |          |          |          |
|----------------|----------------|------------------|-----------------|------------|-------------|-------------|-----------------------------------|------------------------------------|-----------------------------------|----------|----------|----------|----------|----------|----------|----------|----------|----------|----------|
| Group A1       | S1PSY1         | PESKATTESVYNAAL  | <u>ALG</u>      | <u>IAN</u> | <u>QNL</u>  | <u>TNIL</u> | <u>RDV</u>                        | <u>GEDAR</u> ----RGRVYLPQ----DELA  |                                   |          |          |          |          |          |          |          |          |          |          |
|                | S1PSY2         | PESKATTESVYNAAL  | <u>ALG</u>      | <u>IAN</u> | <u>QNL</u>  | <u>TNIL</u> | <u>RDV</u>                        | <u>GEDAR</u> ----RGRVYLPQ----DELA  |                                   |          |          |          |          |          |          |          |          |          |          |
|                | EjPSY1         | PESQATTESVYNAAL  | <u>ALG</u>      | <u>IAN</u> | <u>QNL</u>  | <u>TNIL</u> | <u>RDV</u>                        | <u>GEDAR</u> ----RGRVYLPQ----DELA  |                                   |          |          |          |          |          |          |          |          |          |          |
|                | MdPSY1         | PESQATTESVYNAAL  | <u>ALG</u>      | <u>IAN</u> | <u>QNL</u>  | <u>TNIL</u> | <u>RDV</u>                        | <u>GEDAQSSA</u> -RRGRVYLPQ----DELE |                                   |          |          |          |          |          |          |          |          |          |          |
|                | PpPSY1         | PESQATTESVYNAAL  | <u>ALG</u>      | <u>IAN</u> | <u>QNL</u>  | <u>TNIL</u> | <u>RDV</u>                        | <u>GEDAR</u> ----RGRVYLPQ----DELA  |                                   |          |          |          |          |          |          |          |          |          |          |
|                | FvPSY1         | PDSQATTESVYNAAL  | <u>ALG</u>      | <u>IAN</u> | <u>QNL</u>  | <u>TNIL</u> | <u>RDV</u>                        | <u>GEDLSSLRFLSACFLHSSVRGF</u> DELA |                                   |          |          |          |          |          |          |          |          |          |          |
|                | VvPSY1         | PESQATTESVYKAAL  | <u>ALG</u>      | <u>IAN</u> | <u>QNL</u>  | <u>TNIL</u> | <u>RDV</u>                        | <u>GEDAR</u> ----RGRVYLPQ----DELA  |                                   |          |          |          |          |          |          |          |          |          |          |
|                | CitPSY1        | PDSQATTESVYNAAL  | <u>ALG</u>      | <u>IAN</u> | <u>QNL</u>  | <u>TNIL</u> | <u>RDV</u>                        | <u>GEDAR</u> ----RGRVYLPQ----DELA  |                                   |          |          |          |          |          |          |          |          |          |          |
|                | AtPSY          | PKSKATTESVYNAAL  | <u>ALG</u>      | <u>IAN</u> | <u>QNL</u>  | <u>TNIL</u> | <u>RDV</u>                        | <u>GEDAR</u> ----RGRVYLPQ----DELA  |                                   |          |          |          |          |          |          |          |          |          |          |
|                | Group B1       | EjPSY2A          | PESRASTESVYNAAL | <u>ALG</u> | <u>IAN</u>  | <u>QNL</u>  | <u>TNIL</u>                       | <u>RDV</u>                         | <u>GEDAR</u> ----RGRVYLPQ----DELA |          |          |          |          |          |          |          |          |          |          |
| MdPSY2A        |                | PESSASTESVYNAAL  | <u>ALG</u>      | <u>IAN</u> | <u>QNL</u>  | <u>TNIL</u> | <u>RDV</u>                        | <u>GEDAR</u> ----RGRVYLPQ----DELA  |                                   |          |          |          |          |          |          |          |          |          |          |
| EjPSY2B        |                | PESKASTESVYNAAL  | <u>ALG</u>      | <u>IAN</u> | <u>QNL</u>  | <u>TNI</u>  | <u>PRD</u>                        | <u>VGEDAR</u> ----RGRVYLPQ----DELA |                                   |          |          |          |          |          |          |          |          |          |          |
| MdPSY2B        |                | RESKASTESVYNAAL  | <u>ALG</u>      | <u>IAN</u> | <u>QNL</u>  | <u>TNIL</u> | <u>RDV</u>                        | <u>GEDAR</u> ----RGRVYLPQ----DELA  |                                   |          |          |          |          |          |          |          |          |          |          |
| FvPSY2         |                | PESKASTETVYNAAL  | <u>ALG</u>      | <u>IAN</u> | <u>QNL</u>  | <u>TNIL</u> | <u>RDV</u>                        | <u>GEDAR</u> ----RGRVYLPQ----DELA  |                                   |          |          |          |          |          |          |          |          |          |          |
| PpPSY2         |                | PESKASTETVYNAAL  | <u>ALG</u>      | <u>IAN</u> | <u>QNL</u>  | <u>TNIL</u> | <u>RDV</u>                        | <u>GEDAR</u> ----RGRVYLPQ----DELA  |                                   |          |          |          |          |          |          |          |          |          |          |
| VvPSY2         |                | PDSKASTESVYNAAL  | <u>ALG</u>      | <u>IAN</u> | <u>QNL</u>  | <u>TNIL</u> | <u>RDV</u>                        | <u>GEDAR</u> ----RGRVYLPQ----DELE  |                                   |          |          |          |          |          |          |          |          |          |          |
| Group B2       | ZmPSY2         | PDSKASTESVYNAAL  | <u>ALG</u>      | <u>IAN</u> | <u>QNL</u>  | <u>TNIL</u> | <u>RDV</u>                        | <u>GEDAR</u> ----RGRVYLPQ----DELA  |                                   |          |          |          |          |          |          |          |          |          |          |
|                | SbPSY2         | PDSKASTESVYNAAL  | <u>ALG</u>      | <u>IAN</u> | <u>QNL</u>  | <u>TNIL</u> | <u>RDV</u>                        | <u>GEDAR</u> ----RGRVYLPQ----DELA  |                                   |          |          |          |          |          |          |          |          |          |          |
|                | OsPSY2         | PDSKASTESVYNAAL  | <u>ALG</u>      | <u>IAN</u> | <u>QNL</u>  | <u>TNIL</u> | <u>RDV</u>                        | <u>GEDSR</u> ----RGRVYLPQ----DELA  |                                   |          |          |          |          |          |          |          |          |          |          |
| Group A2       | ZmPSY1         | TESKATTESVYSAAL  | <u>ALG</u>      | <u>IAN</u> | <u>QNL</u>  | <u>TNIL</u> | <u>RDV</u>                        | <u>GEDAR</u> ----RGRVYLPQ----DELA  |                                   |          |          |          |          |          |          |          |          |          |          |
|                | SbPSY1         | PESKATTESVYSAAL  | <u>ALG</u>      | <u>IAN</u> | <u>QNL</u>  | <u>TNIL</u> | <u>RDV</u>                        | <u>GEDAT</u> ----RGRVYLPQ----DELA  |                                   |          |          |          |          |          |          |          |          |          |          |
|                | OsPSY1         | PESKATTESVYSAAL  | <u>ALG</u>      | <u>IAN</u> | <u>QNL</u>  | <u>TNIL</u> | <u>RDV</u>                        | <u>GEDAR</u> ----RGRVYLPQ----DELA  |                                   |          |          |          |          |          |          |          |          |          |          |
| Group C        | ZmPSY3         | PASRAATETVYKGAAL | <u>ALG</u>      | <u>IAN</u> | <u>QNL</u>  | <u>TNIL</u> | <u>RDV</u>                        | <u>GEDAR</u> ----RGRVYLPQ----DELE  |                                   |          |          |          |          |          |          |          |          |          |          |
|                | SbPSY3         | PDSRAATETVYKGAAL | <u>ALG</u>      | <u>IAN</u> | <u>QNL</u>  | <u>TNIL</u> | <u>RDV</u>                        | <u>GEDAR</u> ----RGRVYLPQ----DELE  |                                   |          |          |          |          |          |          |          |          |          |          |
|                | OsPSY3         | PDSRANTETVYKGAAL | <u>ALG</u>      | <u>IAN</u> | <u>QNL</u>  | <u>TNIL</u> | <u>RDV</u>                        | <u>GEDAR</u> ----RGRVYLPQ----DELE  |                                   |          |          |          |          |          |          |          |          |          |          |
| Cyanobacterium | PWNRQSIIP EEEA | <u>ALG</u>       | <u>IAN</u>      | <u>QNL</u> | <u>TNIL</u> | <u>RDV</u>  | <u>GEDID</u> ----RNRIYLPQ----EDLA |                                    |                                   |          |          |          |          |          |          |          |          |          |          |
| Group D        | VvPSY3         | PESPVAQSIYNSALY  | <u>LG</u>       | <u>IGN</u> | <u>QNL</u>  | <u>TNIL</u> | <u>RDV</u>                        | <u>GEDSL</u> ----RGRVYLPQ----DELA  |                                   |          |          |          |          |          |          |          |          |          |          |
|                | CitPSY3        | PDSSSSAQSIYNGALN | <u>LG</u>       | <u>IGN</u> | <u>QNL</u>  | <u>TNIL</u> | <u>RDV</u>                        | <u>GEDAS</u> ----RGRVYLPQ----DELA  |                                   |          |          |          |          |          |          |          |          |          |          |
|                | EjPSY3         | PDSRISAQSTYDSALY | <u>LG</u>       | <u>IGN</u> | <u>QNL</u>  | <u>TNIL</u> | <u>RDV</u>                        | <u>GEDAM</u> ----RGRVYLPQ----DELA  |                                   |          |          |          |          |          |          |          |          |          |          |
|                | MdPSY3         | PDSRISTQSTYDSALY | <u>LG</u>       | <u>IGN</u> | <u>QNL</u>  | <u>TNIL</u> | <u>RDV</u>                        | <u>GEDAM</u> ----RGRVYLPQ----DELA  |                                   |          |          |          |          |          |          |          |          |          |          |
|                | PpPSY3         | PDSLISAQSTYDAALY | <u>LG</u>       | <u>IGN</u> | <u>QNL</u>  | <u>TNIL</u> | <u>RDV</u>                        | <u>GEDAM</u> ----RGRVYLPQ----DELA  |                                   |          |          |          |          |          |          |          |          |          |          |
|                | FvPSY3         | PDSLNSTQSTYDAALY | <u>LG</u>       | <u>IGN</u> | <u>QNL</u>  | <u>TNIL</u> | <u>RDV</u>                        | <u>GEDAA</u> ----RGRVYLPQ----DELA  |                                   |          |          |          |          |          |          |          |          |          |          |
|                | CitPSY2        | PDSASAQSIYNAALY  | <u>LG</u>       | <u>IGN</u> | <u>QNL</u>  | <u>TNIL</u> | <u>RDV</u>                        | <u>GEDAS</u> ----RGRVYLPQ----DELA  |                                   |          |          |          |          |          |          |          |          |          |          |
|                | S1PSY3         | PESCVSAQTVYNAAL  | <u>H</u>        | <u>L</u>   | <u>G</u>    | <u>I</u>    | <u>G</u>                          | <u>N</u>                           | <u>Q</u>                          | <u>N</u> | <u>L</u> | <u>R</u> | <u>D</u> | <u>V</u> | <u>G</u> | <u>E</u> | <u>D</u> | <u>A</u> | <u>L</u> |

**Supplementary Fig. S6. Alignment of PSY amino acid sequences.** Alignment of PSY3s in dicot plants to all PSYs sequences available from the Phytozome; underlining indicates PSY signature motif 2 (conserved domain) (Shumskaya *et al.*, 2012); highlighting, amino acids 252, 260 and 264. Amino acid numbers refer to EjPSY3 sequence.

**Supplementary Table S1.** Primers for RACE PCR

| Gene                       |                 | 5'RACE (5' to 3') primers   | 3'RACE (5' to 3') primers   |
|----------------------------|-----------------|-----------------------------|-----------------------------|
| <i>EjPSY1</i>              | 1 <sup>st</sup> | TATCAGCGTCGGAGAGCCCTGCTTCT  | GTTATGGGCATTTACCTGAATCGCAA  |
|                            | 2 <sup>nd</sup> | TTTGTTAGCTGATTCGCAATCCCTAAC | GCTGGGAAGGTCACAGACAAATGGAGG |
| <i>EjPSY2A<sup>d</sup></i> | 1 <sup>st</sup> | TATCAGCGTCGGAGAGCCCTGCTTCT  | CCCGTTGACATTCAGCCCTTCAGAGA  |
|                            | 2 <sup>nd</sup> | TTTGTTAGCTGATTCGCAATCCCTAAC | ACCTTTACTGCTACTATGTTGCTGGA  |
| <i>EjPSY2B</i>             | 1 <sup>st</sup> | CTTATTCAGTAAATCCCAGTTGTTCA  | TGAAGCAGGCTGCTCTAGTGAG      |
|                            | 2 <sup>nd</sup> | AATCCCAGTTGTTCAAACCGTCAGTA  | AGGCTGCTCTAGTGAGAGAACCGAA   |



**Supplementary Table S2.** Primer sequences for genome walking

| Gene                               |                 | Primers (5' to 3')         |
|------------------------------------|-----------------|----------------------------|
| <i>EjPSY1</i>                      | 1 <sup>st</sup> | TTCTTTTTTACCGTGTTCGGTTCTCT |
|                                    | 2 <sup>nd</sup> | AATATATATGCCTTCGCAAAGGGAT  |
| <i>EjPSY2A/EjPSY2A<sup>d</sup></i> | 1 <sup>st</sup> | GCTGGCATTCTGTTTGGGGCTCACC  |
|                                    | 2 <sup>nd</sup> | AGTTTTGAAAGCAGTGGTAGTTGGC  |
| <i>EjPSY2B</i>                     | 1 <sup>st</sup> | TTCCCGGGTAGAATAATATCCCGC   |
|                                    | 2 <sup>nd</sup> | ACTCAACTGCTTCTTACCCAAGGAT  |

**Supplementary Table S3.** Primers for genomic DNA PCR

| Gene                               | Forward (5' to 3') primers | Reverse (5' to 3') primers |
|------------------------------------|----------------------------|----------------------------|
| <i>EjPSY1</i>                      | TGATGAAACTGAATGAAATG       | TTGAACTGGAATAAATAACACCCT   |
| <i>EjPSY2A/EjPSY2A<sup>d</sup></i> | ATTTGCCAACTACCACTGCTTTCA   | TACACCACATAAGAAACAAGCA     |
| <i>EjPSY2B</i>                     | ACCCAAAACCCCAAAGTCCCAGC    | CCTCAGTTTGTCGCCCAACTAAC    |
| <i>EjPSY3</i>                      | CTTCCAAATGTGTTCTACAATTTC   | TGTTTTTATTATTGGGACATCAA    |

**Supplementary Table S4.** Primer sequences for PCR amplification of the *EjPSY2A/EjPSY2A<sup>d</sup>* genomic fragments

| Gene                               | Primers (5' to 3') |                        |
|------------------------------------|--------------------|------------------------|
| <i>EjPSY2A/EjPSY2A<sup>d</sup></i> | EjPSY2AUP1         | TATGAACCATGATTAGTCTAGC |
|                                    | EjPSY2ADP1         | GTTATTGTCACCGTAGTCGC   |

**Supplementary Table S5.** Primers for real-time PCR

| Gene                                                             | Forward (5' to 3') primers | Reverse (5' to 3') primers |
|------------------------------------------------------------------|----------------------------|----------------------------|
| <i>EjPSY1</i>                                                    | GGGAGTGACAGAGTTGAGTGA      | ATACGCAATAGGCAAGGCAAG      |
| <i>EjPSY2A</i>                                                   | GGATATGCCCGAGAATCAAG       | CTTCCCGCGAAAGATGTCATC      |
| <i>EjPSY2A<sup>d</sup></i>                                       | GGATATGCCCGAGAATCAAG       | TAAGTACTACCATGAACCAA       |
| <i>EjPSY2B</i>                                                   | GGGAAAAGCAAAGAAGTTAGC      | AGATTGAGACCTCAAATAC        |
| <i>EjPSY3/EjPSY3<math>\alpha</math>/EjPSY3<math>\beta</math></i> | CGGTTTGGGTTGTGCGAT         | AAAGGCAGCATGAGAAG          |

**Supplementary Table S6.** Primers for PSY cDNAs subcloned as in-frame translational fusions

| Gene                                                             | Forward (5' to 3') primers          | Reverse (5' to 3') primers          |
|------------------------------------------------------------------|-------------------------------------|-------------------------------------|
| <i>EjPSY1</i>                                                    | <b>GAATTCGTTTTCAAGTTGAAAC</b>       | <b>GTCGACTCCAGCATTGTTG</b>          |
| <i>EjPSY2A</i>                                                   | <b>CCGGAATTCATGTCAGTTGTTCTTCT</b>   | <b>GTCGACTCATCTAGGCACCAACT</b>      |
| <i>EjPSY2A<sup>d</sup></i>                                       | <b>CCGGAATTCATGTCAGTTGTTCTTCT</b>   | <b>GTCGACCTACCATGAACCAAGCT</b>      |
| <i>EjPSY2B</i>                                                   | <b>CCGGAATTCATGTCAGGTGTTCTTCT</b>   | <b>GTCGACTCATCTAGGCACCAACT</b>      |
| <i>EjPSY3/EjPSY3<math>\alpha</math>/EjPSY3<math>\beta</math></i> | <b>GAATTGGATCCTTCCAAATGTGTTCTAC</b> | <b>ATGATGTCGACATAGCTCGAATACTCGC</b> |

**Supplementary Table S7.** Carotenoid content in peel and flesh tissues of white- and red-fleshed loquat cultivars

|       | Carotenoid content<br>( $\mu\text{g g}^{-1}$ FW) | phytoene        | lutein          | violaxanthin    | $\beta$ -cryptoxanthin | $\beta$ -carotene | Total carotenoids  |
|-------|--------------------------------------------------|-----------------|-----------------|-----------------|------------------------|-------------------|--------------------|
| Peel  | Tianzhong                                        | 0               | 3.15 $\pm$ 0.79 | 0.75 $\pm$ 0.12 | 0.69 $\pm$ 0.23        | 7.80 $\pm$ 1.35   | 17.91 $\pm$ 3.48   |
|       | Bingtangzhong                                    | 0               | 1.99 $\pm$ 0.37 | 0.60 $\pm$ 0.09 | 0.46 $\pm$ 0.17        | 8.47 $\pm$ 1.70   | 16.45 $\pm$ 3.06   |
|       | Ninghaibai                                       | 0               | 2.04 $\pm$ 0.14 | 0.58 $\pm$ 0.04 | 0.14 $\pm$ 0.02        | 8.88 $\pm$ 0.28   | 15.05 $\pm$ 0.66   |
|       | White-fleshed Baisha                             | 0               | 3.20 $\pm$ 0.67 | 0.32 $\pm$ 0.12 | 0.21 $\pm$ 0.05        | 11.35 $\pm$ 0.75  | 19.77 $\pm$ 1.48   |
|       | Guanyu                                           | 0               | 2.44 $\pm$ 0.56 | 0.37 $\pm$ 0.10 | 0.56 $\pm$ 0.09        | 7.47 $\pm$ 1.91   | 15.43 $\pm$ 4.13   |
|       | Baiyu                                            | 0               | 2.50 $\pm$ 0.10 | 0.35 $\pm$ 0.17 | 0.92 $\pm$ 0.09        | 8.52 $\pm$ 0.52   | 17.26 $\pm$ 1.13   |
|       | Biqi                                             | 0               | 2.72 $\pm$ 0.37 | 0.59 $\pm$ 0.14 | 0.90 $\pm$ 0.09        | 7.91 $\pm$ 1.95   | 17.19 $\pm$ 4.28   |
|       | Jiajiao                                          | 0.41 $\pm$ 0.09 | 2.31 $\pm$ 0.19 | 0.26 $\pm$ 0.08 | 1.18 $\pm$ 0.28        | 33.89 $\pm$ 5.06  | 54.51 $\pm$ 11.07  |
|       | Baozhu                                           | 2.76 $\pm$ 0.32 | 6.07 $\pm$ 1.61 | 0.88 $\pm$ 0.35 | 3.53 $\pm$ 0.02        | 73.65 $\pm$ 4.08  | 113.94 $\pm$ 8.58  |
|       | Dameiguihongpao                                  | 6.78 $\pm$ 0.91 | 3.38 $\pm$ 0.08 | 1.09 $\pm$ 0.29 | 1.89 $\pm$ 0.03        | 51.08 $\pm$ 8.26  | 79.50 $\pm$ 16.77  |
|       | Red-fleshed Dayeyangdun                          | 0.66 $\pm$ 0.12 | 3.84 $\pm$ 1.52 | 0.80 $\pm$ 0.44 | 1.79 $\pm$ 0.51        | 31.75 $\pm$ 5.39  | 50.56 $\pm$ 17.48  |
|       | Dawuxing                                         | 1.50 $\pm$ 0.15 | 3.80 $\pm$ 0.28 | 1.09 $\pm$ 0.01 | 1.54 $\pm$ 0.09        | 53.98 $\pm$ 0.19  | 78.75 $\pm$ 3.99   |
|       | Luoyangqing                                      | 3.12 $\pm$ 0.51 | 4.18 $\pm$ 1.11 | 0.69 $\pm$ 0.18 | 2.34 $\pm$ 0.75        | 42.78 $\pm$ 5.35  | 68.37 $\pm$ 8.93   |
|       | Dahongpao                                        | 3.49 $\pm$ 0.98 | 4.85 $\pm$ 0.55 | 0.98 $\pm$ 0.11 | 3.72 $\pm$ 0.30        | 69.24 $\pm$ 6.03  | 113.51 $\pm$ 14.13 |
| Flesh | Tianzhong                                        | 0               | 0.05 $\pm$ 0.01 | 0.07 $\pm$ 0.00 | 0.13 $\pm$ 0.04        | 0.06 $\pm$ 0.02   | 0.56 $\pm$ 0.10    |
|       | Bingtangzhong                                    | 0               | 0.05 $\pm$ 0.02 | 0.06 $\pm$ 0.03 | 0.16 $\pm$ 0.07        | 0.07 $\pm$ 0.03   | 0.67 $\pm$ 0.27    |
|       | Ninghaibai                                       | 0               | 0.03 $\pm$ 0.01 | 0.01 $\pm$ 0.00 | 0.04 $\pm$ 0.00        | 0.02 $\pm$ 0.00   | 0.16 $\pm$ 0.04    |
|       | White-fleshed Baisha                             | 0               | 0.04 $\pm$ 0.01 | 0.03 $\pm$ 0.01 | 0.05 $\pm$ 0.00        | 0.03 $\pm$ 0.01   | 0.23 $\pm$ 0.05    |
|       | Guanyu                                           | 0               | 0.02 $\pm$ 0.01 | 0.02 $\pm$ 0.01 | 0.08 $\pm$ 0.03        | 0.05 $\pm$ 0.02   | 0.33 $\pm$ 0.12    |
|       | Baiyu                                            | 0               | 0.01 $\pm$ 0.01 | 0.02 $\pm$ 0.02 | 0.04 $\pm$ 0.02        | 0.02 $\pm$ 0.02   | 0.21 $\pm$ 0.01    |
|       | Biqi                                             | 0               | 0.03 $\pm$ 0.00 | 0.05 $\pm$ 0.01 | 0.21 $\pm$ 0.03        | 0.07 $\pm$ 0.01   | 0.69 $\pm$ 0.10    |
|       | Jiajiao                                          | 0.06 $\pm$ 0.03 | 0.01 $\pm$ 0.00 | 0.23 $\pm$ 0.03 | 0.46 $\pm$ 0.01        | 2.75 $\pm$ 0.03   | 5.30 $\pm$ 1.15    |
|       | Baozhu                                           | 0.34 $\pm$ 0.15 | 0.05 $\pm$ 0.02 | 0.80 $\pm$ 0.29 | 2.83 $\pm$ 0.94        | 3.69 $\pm$ 0.38   | 12.43 $\pm$ 2.69   |
|       | Dameiguihongpao                                  | 0.97 $\pm$ 0.64 | 0.05 $\pm$ 0.15 | 1.10 $\pm$ 0.34 | 2.13 $\pm$ 0.64        | 3.68 $\pm$ 0.64   | 14.41 $\pm$ 3.46   |
|       | Red-fleshed Dayeyangdun                          | 0.38 $\pm$ 0.13 | 0.00 $\pm$ 0.00 | 0.68 $\pm$ 0.13 | 0.97 $\pm$ 0.13        | 4.03 $\pm$ 0.13   | 9.95 $\pm$ 0.61    |
|       | Dawuxing                                         | 0.06 $\pm$ 0.01 | 0.00 $\pm$ 0.00 | 0.62 $\pm$ 0.01 | 0.85 $\pm$ 0.01        | 1.51 $\pm$ 0.01   | 5.38 $\pm$ 1.59    |
|       | Luoyangqing                                      | 0.75 $\pm$ 0.11 | 0.10 $\pm$ 0.02 | 0.94 $\pm$ 0.21 | 2.34 $\pm$ 0.16        | 2.66 $\pm$ 0.50   | 11.54 $\pm$ 2.29   |
|       | Dahongpao                                        | 0.39 $\pm$ 0.08 | 0.05 $\pm$ 0.01 | 0.73 $\pm$ 0.01 | 2.35 $\pm$ 0.35        | 2.91 $\pm$ 0.65   | 11.96 $\pm$ 1.30   |

$\pm$  = Standard deviation (n=3)

**Supplementary Table S8.** Carotenoid content in various tissues of Luoyangqing (LYQ) and Baisha (BS)

| Carotenoid content ( $\mu\text{g g}^{-1}$ FW) | Peel of green fruit |                 | Peel of ripe fruit |                  | Flesh of green fruit |                 | Flesh of ripe fruit |                 | Young leaf       |                  | Mature leaf       |                   |
|-----------------------------------------------|---------------------|-----------------|--------------------|------------------|----------------------|-----------------|---------------------|-----------------|------------------|------------------|-------------------|-------------------|
|                                               | LYQ                 | BS              | LYQ                | BS               | LYQ                  | BS              | LYQ                 | BS              | LYQ              | BS               | LYQ               | BS                |
| neoxanthin                                    | 0.12 $\pm$ 0.03     | 0.14 $\pm$ 0.02 | 0.15 $\pm$ 0.07    | 0.09 $\pm$ 0.02  | 0.11 $\pm$ 0.01      | 0.02 $\pm$ 0.01 | 0.04 $\pm$ 0.01     | 0.01 $\pm$ 0.00 | 0.14 $\pm$ 0.04  | 0.15 $\pm$ 0.02  | 0.24 $\pm$ 0.04   | 0.23 $\pm$ 0.05   |
| violaxanthin                                  | 0.52 $\pm$ 0.12     | 0.40 $\pm$ 0.15 | 2.68 $\pm$ 0.55    | 0.68 $\pm$ 0.28  | 0.14 $\pm$ 0.05      | 0.03 $\pm$ 0.01 | 0.50 $\pm$ 0.09     | 0.03 $\pm$ 0.01 | 4.17 $\pm$ 1.23  | 3.48 $\pm$ 0.98  | 21.60 $\pm$ 3.25  | 17.88 $\pm$ 2.88  |
| luteoxanthin                                  | 0.42 $\pm$ 0.13     | 0.29 $\pm$ 0.04 | 0.53 $\pm$ 0.15    | 0.56 $\pm$ 0.29  | 0.03 $\pm$ 0.01      | 0.05 $\pm$ 0.02 | 0.35 $\pm$ 0.10     | 0.02 $\pm$ 0.00 | 0.99 $\pm$ 0.32  | 0.91 $\pm$ 0.17  | 13.28 $\pm$ 2.26  | 10.10 $\pm$ 1.97  |
| 9- <i>cis</i> -violaxanthin                   | 0.03 $\pm$ 0.01     | 0.04 $\pm$ 0.01 | 0.69 $\pm$ 0.18    | 0.32 $\pm$ 0.12  | 0.07 $\pm$ 0.02      | 0.03 $\pm$ 0.01 | 0.94 $\pm$ 0.41     | 0.03 $\pm$ 0.01 | 1.11 $\pm$ 0.31  | 0.86 $\pm$ 0.28  | 7.55 $\pm$ 1.99   | 5.43 $\pm$ 0.74   |
| lutein                                        | 9.58 $\pm$ 2.51     | 5.75 $\pm$ 1.16 | 4.18 $\pm$ 1.11    | 3.20 $\pm$ 0.67  | 0.37 $\pm$ 0.09      | 0.16 $\pm$ 0.00 | 0.10 $\pm$ 0.06     | 0.04 $\pm$ 0.01 | 8.03 $\pm$ 1.96  | 6.41 $\pm$ 1.23  | 57.38 $\pm$ 6.57  | 48.87 $\pm$ 5.54  |
| phytoene                                      | 0.09 $\pm$ 0.02     | 0.03 $\pm$ 0.02 | 3.12 $\pm$ 0.51    | 0.04 $\pm$ 0.05  | 0.00 $\pm$ 0.00      | 0.00 $\pm$ 0.00 | 0.75 $\pm$ 0.11     | 0.00 $\pm$ 0.00 | 0.03 $\pm$ 0.01  | 0.00 $\pm$ 0.00  | 1.32 $\pm$ 0.03   | 1.77 $\pm$ 0.27   |
| phytofluene                                   | 0.02 $\pm$ 0.00     | 0.00 $\pm$ 0.00 | 0.62 $\pm$ 0.12    | 0.00 $\pm$ 0.00  | 0.00 $\pm$ 0.00      | 0.00 $\pm$ 0.00 | 0.17 $\pm$ 0.02     | 0.00 $\pm$ 0.00 | 0.01 $\pm$ 0.00  | 0.00 $\pm$ 0.00  | 0.11 $\pm$ 0.01   | 0.10 $\pm$ 0.00   |
| $\beta$ -cryptoxanthin                        | 0.00 $\pm$ 0.00     | 0.00 $\pm$ 0.00 | 2.34 $\pm$ 0.75    | 0.21 $\pm$ 0.05  | 0.02 $\pm$ 0.00      | 0.00 $\pm$ 0.00 | 2.34 $\pm$ 0.16     | 0.05 $\pm$ 0.00 | 0.00 $\pm$ 0.00  | 0.00 $\pm$ 0.00  | 0.00 $\pm$ 0.00   | 0.00 $\pm$ 0.00   |
| $\zeta$ -carotene                             | 0.00 $\pm$ 0.00     | 0.18 $\pm$ 0.01 | 0.63 $\pm$ 0.16    | 0.00 $\pm$ 0.00  | 0.00 $\pm$ 0.00      | 0.00 $\pm$ 0.00 | 0.29 $\pm$ 0.11     | 0.00 $\pm$ 0.00 | 0.00 $\pm$ 0.00  | 0.00 $\pm$ 0.00  | 0.00 $\pm$ 0.00   | 0.00 $\pm$ 0.00   |
| $\beta$ -carotene                             | 3.25 $\pm$ 0.93     | 1.76 $\pm$ 0.22 | 42.78 $\pm$ 5.35   | 11.35 $\pm$ 0.75 | 0.52 $\pm$ 0.12      | 0.14 $\pm$ 0.03 | 2.66 $\pm$ 0.50     | 0.03 $\pm$ 0.01 | 2.84 $\pm$ 0.33  | 2.02 $\pm$ 0.99  | 32.69 $\pm$ 4.89  | 25.81 $\pm$ 3.38  |
| unidentified                                  | 2.64 $\pm$ 1.13     | 0.82 $\pm$ 0.22 | 3.29 $\pm$ 2.37    | 3.40 $\pm$ 0.42  | 0.16 $\pm$ 0.05      | 0.07 $\pm$ 0.02 | 3.05 $\pm$ 1.18     | 0.03 $\pm$ 0.02 | 2.40 $\pm$ 0.66  | 2.46 $\pm$ 0.71  | 12.21 $\pm$ 2.12  | 9.17 $\pm$ 1.17   |
| Total carotenoids                             | 16.67 $\pm$ 2.88    | 9.41 $\pm$ 1.35 | 68.37 $\pm$ 8.93   | 19.77 $\pm$ 1.48 | 1.43 $\pm$ 0.36      | 0.50 $\pm$ 0.15 | 11.54 $\pm$ 2.29    | 0.23 $\pm$ 0.05 | 39.92 $\pm$ 8.78 | 33.96 $\pm$ 6.55 | 146.37 $\pm$ 1.41 | 119.36 $\pm$ 5.64 |

$\pm$  = Standard deviation (n=3)
